# Supplementary material for: Limb bone strains during climbing in green iguanas (Iguana iguana): testing biomechanical release as a mechanism promoting morphological transitions in arboreal vertebrates
Source: Oxford University Press journal article supplement (doi:10.1242/jeb.245175), 2023-05-10
Supplement: jeb245175supp.pdf [file jeb245175supp.pdf]

**Table S1.** Hindlimb strain data across strain gauge metrics, reported for each individual from which data were successfully collected, with mass and snout-vent length (SVL).

“R” in gauge metric row indicates that this metric was associated with the rosette gauge. Values in first five rows indicate the average maximum/minimum strain (units in microstrain,  $\mu\epsilon = 10^{-6} \times$  strain)  $\pm$  standard deviation, with number of steps in parentheses.

| Animal                            | Gauge metric             | FL-LEV                  | FL-COMP                 | FL-INC                   | CURV-INC                 | CURV-LEV                |
|-----------------------------------|--------------------------|-------------------------|-------------------------|--------------------------|--------------------------|-------------------------|
| IG01 - mass=1.27 kg; SVL=34.29 cm | SE-Ventral               | -164 $\pm$ 156 (N = 13) | -78 $\pm$ 57 (N = 23)   | -108 $\pm$ 66 (N = 13)   | -73 $\pm$ 63 (N = 13)    | -117 $\pm$ 79 (N = 8)   |
|                                   | SE-Anterior              | -208 $\pm$ 125 (N = 13) | -297 $\pm$ 198 (N = 23) | -758 $\pm$ 239 (N = 13)  | -336 $\pm$ 304 (N = 13)  | -117 $\pm$ 98 (N = 8)   |
|                                   | SE-R Dorsal              | 119 $\pm$ 61 (N = 13)   | 191 $\pm$ 103 (N = 23)  | 570 $\pm$ 189 (N = 13)   | 426 $\pm$ 344 (N = 13)   | 108 $\pm$ 80 (N = 8)    |
|                                   | R-pT                     | 443 $\pm$ 303 (N = 13)  | 351 $\pm$ 187 (N = 23)  | 576 $\pm$ 187 (N = 13)   | 475 $\pm$ 291 (N = 13)   | 417 $\pm$ 180 (N = 8)   |
|                                   | R-pC                     | -416 $\pm$ 259 (N = 13) | -600 $\pm$ 380 (N = 23) | -1680 $\pm$ 509 (N = 13) | -984 $\pm$ 832 (N = 11)  | -322 $\pm$ 152 (N = 8)  |
|                                   | R-Shear                  | 278 $\pm$ 155 (N = 13)  | 281 $\pm$ 142 (N = 23)  | 489 $\pm$ 104 (N = 13)   | 416 $\pm$ 384 (N = 13)   | 111 $\pm$ 41 (N = 8)    |
|                                   | R-Phi (units in degrees) | 49 $\pm$ 26 (N = 13)    | 45 $\pm$ 27 (N = 23)    | 22 $\pm$ 20 (N = 13)     | 43 $\pm$ 32 (N = 13)     | 39 $\pm$ 38 (N = 8)     |
| IG02 - mass=1.05 kg; SVL=33.66    | SE-Ventral               | 133 $\pm$ 76 (N = 25)   | 172 $\pm$ 119 (N = 19)  | 161 $\pm$ 97 (N = 21)    | 177 $\pm$ 87 (N = 19)    | 159 $\pm$ 50 (N = 22)   |
|                                   | SE-Anterior              | -115 $\pm$ 92 (N = 25)  | -185 $\pm$ 171 (N = 19) | -334 $\pm$ 160 (N = 21)  | -236 $\pm$ 122 (N = 19)  | -106 $\pm$ 87 (N = 22)  |
|                                   | SE-R Dorsal              | 113 $\pm$ 88 (N = 25)   | 173 $\pm$ 130 (N = 19)  | 274 $\pm$ 112 (N = 21)   | 276 $\pm$ 121 (N = 19)   | 143 $\pm$ 110 (N = 22)  |
|                                   | R-pT                     | 158 $\pm$ 87 (N = 25)   | 274 $\pm$ 158 (N = 19)  | 316 $\pm$ 114 (N = 21)   | 325 $\pm$ 124 (N = 19)   | 600 $\pm$ 566 (N = 20)  |
|                                   | R-pC                     | -435 $\pm$ 417 (N = 25) | -797 $\pm$ 490 (N = 18) | -1400 $\pm$ 557 (N = 20) | -1090 $\pm$ 493 (N = 19) | -671 $\pm$ 568 (N = 22) |
|                                   | R-Shear                  | 260 $\pm$ 186 (N = 25)  | 378 $\pm$ 123 (N = 19)  | 324 $\pm$ 144 (N = 21)   | 376 $\pm$ 144 (N = 19)   | 614 $\pm$ 468 (N = 20)  |
|                                   | R-Phi (units in degrees) | 63 $\pm$ 40 (N = 25)    | 53 $\pm$ 25 (N = 19)    | 69 $\pm$ 28 (N = 21)     | 76 $\pm$ 12 (N = 19)     | 47 $\pm$ 24 (N = 20)    |

| Animal                            | Gauge metric             | FL-LEV            | FL-COMP           | FL-INC            | CURV-INC          | CURV-LEV          |
|-----------------------------------|--------------------------|-------------------|-------------------|-------------------|-------------------|-------------------|
| IG03 - mass=0.86 kg; SVL=30.8 cm  | SE-Ventral               | 78±91 (N = 27)    | 114±131 (N = 32)  | 353±206 (N = 24)  | 328±218 (N = 22)  | 114±204 (N = 12)  |
|                                   | SE-Anterior              | -258±219 (N = 24) | -251±148 (N = 32) | -269±120 (N = 24) | -297±132 (N = 4)  | -190±144 (N = 12) |
|                                   | SE-R Dorsal              | -197±83 (N = 27)  | -132±78 (N = 32)  | -165±90 (N = 24)  | -181±75 (N = 18)  | -209±99 (N = 12)  |
|                                   | R-pT                     | 845±1 (N = 2)     |                   | 313±177 (N = 24)  | 281±207 (N = 17)  | 157±142 (N = 9)   |
|                                   | R-pC                     | -1543±331 (N = 7) |                   | -802±429 (N = 24) | -630±368 (N = 17) | -459±327 (N = 9)  |
|                                   | R-Shear                  |                   |                   | 283±158 (N = 24)  | 345±256 (N = 17)  | 139±140 (N = 9)   |
|                                   | R-Phi (units in degrees) |                   |                   | 48±25 (N = 24)    | 31±21 (N = 17)    |                   |
| IG04 - mass=0.86 kg; SVL=30.16 cm | SE-Ventral               |                   |                   | 304±181 (N = 17)  | 462±244 (N = 18)  |                   |
|                                   | SE-Anterior              |                   |                   | 285±322 (N = 16)  | 125±49 (N = 15)   |                   |
|                                   | SE-R Dorsal              |                   |                   | 256±94 (N = 17)   | 333±66 (N = 18)   |                   |
|                                   | R-pT                     |                   |                   | 354±650 (N = 17)  | 487±287 (N = 18)  |                   |
|                                   | R-pC                     |                   |                   | -768±238 (N = 17) | -809±264 (N = 18) |                   |
|                                   | R-Shear                  |                   |                   | 297±663 (N = 17)  | 391±192 (N = 18)  |                   |
|                                   | R-Phi (units in degrees) |                   |                   | 16±13 (N = 17)    | 18±18 (N = 18)    |                   |

| Animal                            | Gauge metric             | FL-LEV            | FL-COMP            | FL-INC | CURV-INC | CURV-LEV |
|-----------------------------------|--------------------------|-------------------|--------------------|--------|----------|----------|
| IG05 - mass=1.05 kg; SVL=36.51 cm | SE-Ventral               |                   |                    |        |          |          |
|                                   | SE-Anterior              | -630±594 (N = 2)  | -529±220 (N = 15)  |        |          |          |
|                                   | SE-R Dorsal              | 268±38 (N = 2)    | 451±307 (N = 15)   |        |          |          |
|                                   | R-pT                     | 326±120 (N = 2)   | 531±281 (N = 15)   |        |          |          |
|                                   | R-pC                     | -1392±376 (N = 2) | -1782±570 (N = 13) |        |          |          |
|                                   | R-Shear                  | 589±377 (N = 2)   | 563±248 (N = 15)   |        |          |          |
|                                   | R-Phi (units in degrees) | 57±38 (N = 2)     | 52±31 (N = 15)     |        |          |          |

**Table S2.** Forelimb strain data across strain gauge metrics reported for each individual from which data were successfully collected, with mass and snout-vent length (SVL). “R” in gauge metric row indicates that this metric was associated with the rosette gauge. Values in first five rows indicate the average maximum/minimum strain (units in microstrain,  $\mu\epsilon = 10^{-6} \times \text{strain}$ )  $\pm$  standard deviation, with number of steps in parentheses.

| Animal                            | Gauge metric             | FL-LEV                  | FL-COMP                 | FL-INC                   | CURV-INC                 | CURV-LEV                |
|-----------------------------------|--------------------------|-------------------------|-------------------------|--------------------------|--------------------------|-------------------------|
| IG07 - mass=1.18 kg; SVL=29.72 cm | SE-Postero-ventral       | 266 $\pm$ 149 (N = 23)  | 241 $\pm$ 113 (N = 14)  | 430 $\pm$ 143 (N = 34)   | 478 $\pm$ 153 (N = 16)   |                         |
|                                   | SE-Ventral               | 430 $\pm$ 244 (N = 23)  | 478 $\pm$ 200 (N = 19)  | 833 $\pm$ 274 (N = 34)   | 977 $\pm$ 222 (N = 16)   |                         |
|                                   | SE-R Anterior            |                         |                         | -1338 $\pm$ 262 (N = 34) | -1329 $\pm$ 408 (N = 16) |                         |
|                                   | R-pT                     |                         |                         |                          |                          |                         |
|                                   | R-pC                     |                         |                         |                          |                          |                         |
|                                   | R-Shear                  |                         |                         |                          |                          |                         |
|                                   | R-Phi (units in degrees) |                         |                         |                          |                          |                         |
| IG08 - mass=2.05 kg; 32.39 cm     | SE-Postero-ventral       | 647 $\pm$ 309 (N = 23)  | 531 $\pm$ 448 (N = 25)  | 178 $\pm$ 118 (N = 18)   |                          | 248 $\pm$ 128 (N = 26)  |
|                                   | SE-Ventral               | 213 $\pm$ 216 (N = 23)  | 157 $\pm$ 174 (N = 25)  | 139 $\pm$ 82 (N = 18)    |                          | 85 $\pm$ 80 (N = 26)    |
|                                   | SE-R Anterior            | -136 $\pm$ 81 (N = 23)  | -141 $\pm$ 110 (N = 25) | -104 $\pm$ 45 (N = 18)   |                          | -132 $\pm$ 58 (N = 26)  |
|                                   | R-pT                     | 434 $\pm$ 176 (N = 23)  | 333 $\pm$ 178 (N = 25)  | 271 $\pm$ 90 (N = 18)    |                          | 374 $\pm$ 140 (N = 26)  |
|                                   | R-pC                     | -420 $\pm$ 145 (N = 23) | -386 $\pm$ 137 (N = 25) | -297 $\pm$ 65 (N = 18)   |                          | -371 $\pm$ 130 (N = 26) |
|                                   | R-Shear                  | 739 $\pm$ 413 (N = 23)  | 683 $\pm$ 309 (N = 25)  | 528 $\pm$ 167 (N = 18)   |                          | 719 $\pm$ 267 (N = 26)  |
|                                   | R-Phi (units in degrees) | 47 $\pm$ 9 (N = 23)     | 49 $\pm$ 4 (N = 25)     | 50 $\pm$ 4 (N = 18)      |                          | 50 $\pm$ 3 (N = 26)     |

| Animal                         | Gauge metric             | FL-LEV            | FL-COMP           | FL-INC            | CURV-INC          | CURV-LEV          |
|--------------------------------|--------------------------|-------------------|-------------------|-------------------|-------------------|-------------------|
| IG09 - mass=1.22 kg; SVL=35.81 | SE-Postero-ventral       |                   |                   | 178±154 (N = 23)  | 253±406 (N = 22)  |                   |
|                                | SE-Ventral               |                   |                   |                   |                   |                   |
|                                | SE-R Anterior            |                   |                   | -329±116 (N = 23) | -224±137 (N = 22) |                   |
|                                | R-pT                     |                   |                   | 651±296 (N = 23)  | 413±87 (N = 22)   |                   |
|                                | R-pC                     |                   |                   | -584±175 (N = 23) | -446±93 (N = 22)  |                   |
|                                | R-Shear                  |                   |                   | 983±318 (N = 23)  | 726±147 (N = 22)  |                   |
|                                | R-Phi (units in degrees) |                   |                   | 59±2 (N = 23)     | 59±4 (N = 22)     |                   |
| IG12 - mass=2.5kg; SVL=44.7 cm | SE-Postero-ventral       | -431±122 (N = 19) | -468±117 (N = 18) | -541±306 (N = 18) | -336±434 (N = 2)  | -504±121 (N = 17) |
|                                | SE-Ventral               | 307±291 (N = 9)   |                   |                   |                   |                   |
|                                | SE-R Anterior            | 368±131 (N = 19)  |                   |                   |                   |                   |
|                                | R-pT                     |                   |                   |                   |                   |                   |
|                                | R-pC                     |                   |                   |                   |                   |                   |
|                                | R-Shear                  |                   |                   |                   |                   |                   |
|                                | R-Phi (units in degrees) |                   |                   |                   |                   |                   |

| Animal                         | Gauge metric             | FL-LEV             | FL-COMP            | FL-INC             | CURV-INC           | CURV-LEV           |
|--------------------------------|--------------------------|--------------------|--------------------|--------------------|--------------------|--------------------|
| IG13 - mass=1.13 kg; SVL=34.67 | SE-Postero-ventral       | 379±165 (N = 17)   | 353±260 (N = 15)   | 540±220 (N = 22)   | 414±170 (N = 8)    | 219±142 (N = 19)   |
|                                | SE-Ventral               | -164±85 (N = 17)   | -154±86 (N = 15)   | -140±113 (N = 22)  | -126±54 (N = 8)    | -173±126 (N = 19)  |
|                                | SE-R Anterior            |                    |                    |                    |                    |                    |
|                                | R-pT                     |                    | 170±119 (N = 18)   | 196±89 (N = 22)    | 146±67 (N = 8)     |                    |
|                                | R-pC                     |                    | -270±126 (N = 18)  | -317±132 (N = 22)  | -278±152 (N = 8)   |                    |
|                                | R-Shear                  |                    | 227±87 (N = 18)    | 270±114 (N = 22)   | 217±48 (N = 8)     |                    |
|                                | R-Phi (units in degrees) |                    |                    | 36±16 (N = 22)     | 44±18 (N = 8)      |                    |
| IG14 - 1.36 kg; SVL=36.22 cm   | SE-Postero-ventral       | 325±167 (N = 17)   | 537±212 (N = 15)   | 672±283 (N = 25)   | 1040±386 (N = 22)  | 259±273 (N = 17)   |
|                                | SE-Ventral               | 288±107 (N = 17)   | 429±94 (N = 15)    |                    |                    | 246±128 (N = 17)   |
|                                | SE-R Anterior            | -324±188 (N = 17)  | -446±313 (N = 15)  | -422±175 (N = 25)  | -414±176 (N = 22)  | -283±284 (N = 17)  |
|                                | R-pT                     | 867±241 (N = 17)   | 987±330 (N = 15)   | 1324±340 (N = 25)  | 1712±457 (N = 22)  | 1042±279 (N = 17)  |
|                                | R-pC                     | -1016±373 (N = 17) | -1301±310 (N = 15) | -1430±381 (N = 25) | -1519±527 (N = 22) | -1167±337 (N = 17) |
|                                | R-Shear                  | 1801±654 (N = 17)  | 2185±688 (N = 15)  | 2648±699 (N = 25)  | 2810±834 (N = 22)  | 2166±594 (N = 17)  |
|                                | R-Phi (units in degrees) | 53±43 (N = 17)     | 47±7 (N = 15)      | 50±3 (N = 25)      | 51±5 (N = 22)      | 43±4 (N = 17)      |

**Table S3. Total individual and interacting trackway factor influence on hindlimb (a) and forelimb (b) strain metrics.** Type III ANOVA tests were performed, with *p*-value significance level indicated in the right column.

(a)

| Hindlimb             | Factor               | Degrees of Freedom | F value  | Pr(>F) |       |
|----------------------|----------------------|--------------------|----------|--------|-------|
| Maximum SE-R Dorsal  | angle                | (1, 330)           | 35.196   | 0.000  | ***   |
|                      | curvature            | (1, 328)           | 0.267    | 0.606  |       |
|                      | stiffness            | (1, 328)           | 0.570    | 0.451  |       |
|                      | mass                 | (1, 3)             | 0.401    | 0.573  |       |
|                      | angle:curvature      | (1, 328)           | 3.531    | 0.061  |       |
|                      | angle:mass           | (1, 329)           | 50.869   | 0.000  | ***   |
|                      | curvature:mass       | (1, 328)           | 0.452    | 0.502  |       |
|                      | stiffness:mass       | (1, 328)           | 1.231    | 0.268  |       |
|                      | angle:curvature:mass | (1, 328)           | 3.984    | 0.047  | *     |
|                      | Minimum SE-R Dorsal  | angle              | (1, 331) | 0.900  | 0.343 |
| curvature            |                      | (1, 328)           | 0.035    | 0.852  |       |
| stiffness            |                      | (1, 328)           | 2.276    | 0.132  |       |
| mass                 |                      | (1, 3)             | 0.863    | 0.433  |       |
| angle:curvature      |                      | (1, 328)           | 2.453    | 0.118  |       |
| angle:mass           |                      | (1, 331)           | 0.380    | 0.538  |       |
| curvature:mass       |                      | (1, 328)           | 0.009    | 0.924  |       |
| stiffness:mass       |                      | (1, 328)           | 1.703    | 0.193  |       |
| angle:curvature:mass |                      | (1, 328)           | 3.079    | 0.080  |       |
| Minimum R-pC         |                      | angle              | (1, 268) | 22.075 | 0.000 |
|                      | curvature            | (1, 266)           | 0.616    | 0.433  |       |
|                      | stiffness            | (1, 269)           | 1.728    | 0.190  |       |
|                      | mass                 | (1, 3)             | 0.112    | 0.762  |       |
|                      | angle:curvature      | (1, 266)           | 10.781   | 0.001  | **    |
|                      | angle:mass           | (1, 267)           | 32.732   | 0.000  | ***   |
|                      | curvature:mass       | (1, 266)           | 0.095    | 0.758  |       |
|                      | stiffness:mass       | (1, 269)           | 2.417    | 0.121  |       |
|                      | angle:curvature:mass | (1, 266)           | 12.255   | 0.001  | ***   |
|                      | Maximum R-pT         | angle              | (1, 259) | 0.018  | 0.894 |
| curvature            |                      | (1, 268)           | 0.088    | 0.767  |       |
| stiffness            |                      | (1, 252)           | 0.463    | 0.497  |       |
| mass                 |                      | (1, 3)             | 0.500    | 0.533  |       |
| angle:curvature      |                      | (1, 268)           | 0.699    | 0.404  |       |
| angle:mass           |                      | (1, 264)           | 0.027    | 0.870  |       |
| curvature:mass       |                      | (1, 268)           | 0.000    | 0.992  |       |
| stiffness:mass       |                      | (1, 259)           | 0.392    | 0.532  |       |
| angle:curvature:mass |                      | (1, 268)           | 1.401    | 0.238  |       |
| Maximum R-Shear      |                      | angle              | (1, 263) | 0.063  | 0.802 |

|                     |                      |          |        |       |     |
|---------------------|----------------------|----------|--------|-------|-----|
|                     | curvature            | (1, 266) | 2.932  | 0.088 |     |
|                     | stiffness            | (1, 266) | 0.930  | 0.336 |     |
|                     | mass                 | (1, 2)   | 0.104  | 0.773 |     |
|                     | angle:curvature      | (1, 266) | 0.292  | 0.590 |     |
|                     | angle:mass           | (1, 264) | 0.242  | 0.623 |     |
|                     | curvature:mass       | (1, 266) | 2.163  | 0.143 |     |
|                     | stiffness:mass       | (1, 266) | 0.740  | 0.391 |     |
|                     | angle:curvature:mass | (1, 266) | 0.112  | 0.738 |     |
| Maximum SE-Ventral  | angle                | (1, 292) | 14.937 | 0.000 | *** |
|                     | curvature            | (1, 294) | 3.807  | 0.052 |     |
|                     | stiffness            | (1, 293) | 6.328  | 0.012 | *   |
|                     | mass                 | (1, 3)   | 0.817  | 0.440 |     |
|                     | angle:curvature      | (1, 294) | 1.271  | 0.261 |     |
|                     | angle:mass           | (1, 294) | 12.143 | 0.001 | *** |
|                     | curvature:mass       | (1, 293) | 2.927  | 0.088 |     |
|                     | stiffness:mass       | (1, 293) | 5.245  | 0.023 | *   |
|                     | angle:curvature:mass | (1, 293) | 0.870  | 0.352 |     |
| Minimum SE-Ventral  | angle                | (1, 289) | 16.872 | 0.000 | *** |
|                     | curvature            | (1, 294) | 7.790  | 0.006 | **  |
|                     | stiffness            | (1, 292) | 1.389  | 0.239 |     |
|                     | mass                 | (1, 2)   | 3.024  | 0.216 |     |
|                     | angle:curvature      | (1, 293) | 8.354  | 0.004 | **  |
|                     | angle:mass           | (1, 292) | 28.015 | 0.000 | *** |
|                     | curvature:mass       | (1, 293) | 11.937 | 0.001 | *** |
|                     | stiffness:mass       | (1, 292) | 2.105  | 0.148 |     |
|                     | angle:curvature:mass | (1, 293) | 10.569 | 0.001 | **  |
| Maximum SE-Anterior | angle                | (1, 204) | 40.386 | 0.000 | *** |
|                     | curvature            | (1, 331) | 4.126  | 0.043 | *   |
|                     | stiffness            | (1, 332) | 1.278  | 0.259 |     |
|                     | mass                 | (1, 1)   | 23.993 | 0.078 |     |
|                     | angle:curvature      | (1, 331) | 0.047  | 0.829 |     |
|                     | angle:mass           | (1, 249) | 30.460 | 0.000 | *** |
|                     | curvature:mass       | (1, 331) | 3.453  | 0.064 |     |
|                     | stiffness:mass       | (1, 332) | 1.067  | 0.302 |     |
|                     | angle:curvature:mass | (1, 331) | 0.048  | 0.826 |     |
| Minimum SE-Anterior | angle                | (1, 334) | 4.948  | 0.027 | *   |
|                     | curvature            | (1, 333) | 1.048  | 0.307 |     |
|                     | stiffness            | (1, 333) | 0.252  | 0.616 |     |
|                     | mass                 | (1, 3)   | 0.014  | 0.913 |     |



|                                                             |                      |          |       |       |  |
|-------------------------------------------------------------|----------------------|----------|-------|-------|--|
|                                                             | angle:curvature      | (1, 333) | 0.092 | 0.762 |  |
|                                                             | angle:mass           | (1, 334) | 3.437 | 0.065 |  |
|                                                             | curvature:mass       | (1, 333) | 1.471 | 0.226 |  |
|                                                             | stiffness:mass       | (1, 333) | 0.392 | 0.532 |  |
|                                                             | angle:curvature:mass | (1, 333) | 0.165 | 0.685 |  |
| * – <0.05 P-VALUE; ** – <0.01 P-VALUE; *** – <0.001 P-VALUE |                      |          |       |       |  |

(b)

| Forelimb              | Factor                | Degrees of Freedom | F value  | Pr(>F) |       |
|-----------------------|-----------------------|--------------------|----------|--------|-------|
| Maximum SE-R Anterior | angle                 | (1, 314)           | 59.346   | 0.000  | ***   |
|                       | curvature             | (1, 314)           | 11.581   | 0.001  | ***   |
|                       | stiffness             | (1, 313)           | 1.021    | 0.313  |       |
|                       | mass                  | (1, 5)             | 1.774    | 0.239  |       |
|                       | angle:curvature       | (1, 313)           | 15.193   | 0.000  | ***   |
|                       | angle:mass            | (1, 314)           | 43.746   | 0.000  | ***   |
|                       | curvature:mass        | (1, 314)           | 13.754   | 0.000  | ***   |
|                       | stiffness:mass        | (1, 313)           | 0.675    | 0.412  |       |
|                       | angle:curvature:mass  | (1, 313)           | 16.716   | 0.000  | ***   |
|                       | Minimum SE-R Anterior | angle              | (1, 313) | 0.693  | 0.406 |
| curvature             |                       | (1, 312)           | 0.423    | 0.516  |       |
| stiffness             |                       | (1, 311)           | 2.463    | 0.118  |       |
| mass                  |                       | (1, 5)             | 0.715    | 0.440  |       |
| angle:curvature       |                       | (1, 311)           | 0.068    | 0.794  |       |
| angle:mass            |                       | (1, 313)           | 0.285    | 0.594  |       |
| curvature:mass        |                       | (1, 312)           | 0.270    | 0.604  |       |
| stiffness:mass        |                       | (1, 312)           | 1.874    | 0.172  |       |
| angle:curvature:mass  |                       | (1, 311)           | 0.080    | 0.777  |       |
| Minimum R-pC          |                       | angle              | (1, 270) | 1.234  | 0.268 |
|                       | curvature             | (1, 269)           | 1.301    | 0.255  |       |
|                       | stiffness             | (1, 269)           | 14.913   | 0.000  | ***   |
|                       | mass                  | (1, 2)             | 0.020    | 0.900  |       |
|                       | angle:curvature       | (1, 269)           | 7.655    | 0.006  | **    |
|                       | angle:mass            | (1, 270)           | 0.056    | 0.813  |       |
|                       | curvature:mass        | (1, 270)           | 2.115    | 0.147  |       |
|                       | stiffness:mass        | (1, 269)           | 12.270   | 0.001  | ***   |
|                       | angle:curvature:mass  | (1, 270)           | 6.873    | 0.009  | **    |
|                       | Maximum R-pT          | angle              | (1, 270) | 3.994  | 0.047 |
| curvature             |                       | (1, 270)           | 24.148   | 0.000  | ***   |
| stiffness             |                       | (1, 269)           | 12.538   | 0.000  | ***   |
| mass                  |                       | (1, 2)             | 0.664    | 0.499  |       |
| angle:curvature       |                       | (1, 270)           | 46.013   | 0.000  | ***   |
| angle:mass            |                       | (1, 270)           | 11.463   | 0.001  | ***   |
| curvature:mass        |                       | (1, 270)           | 31.791   | 0.000  | ***   |
| stiffness:mass        |                       | (1, 269)           | 11.813   | 0.001  | ***   |
| angle:curvature:mass  |                       | (1, 270)           | 48.462   | 0.000  | ***   |
| Maximum R-Shear       |                       | angle              | (1, 270) | 0.721  | 0.397 |

|                           |                      |          |        |       |     |
|---------------------------|----------------------|----------|--------|-------|-----|
|                           | curvature            | (1, 269) | 1.835  | 0.177 |     |
|                           | stiffness            | (1, 269) | 16.804 | 0.000 | *** |
|                           | mass                 | (1, 2)   | 0.096  | 0.785 |     |
|                           | angle:curvature      | (1, 269) | 12.108 | 0.001 | *** |
|                           | angle:mass           | (1, 270) | 0.006  | 0.938 |     |
|                           | curvature:mass       | (1, 269) | 3.197  | 0.075 |     |
|                           | stiffness:mass       | (1, 269) | 14.942 | 0.000 | *** |
|                           | angle:curvature:mass | (1, 269) | 10.837 | 0.001 | **  |
| Maximum SE-Posteroventral | angle                | (1, 513) | 1.186  | 0.277 |     |
|                           | curvature            | (1, 513) | 7.329  | 0.007 | **  |
|                           | stiffness            | (1, 512) | 1.146  | 0.285 |     |
|                           | mass                 | (1, 4)   | 1.140  | 0.340 |     |
|                           | angle:curvature      | (1, 513) | 4.561  | 0.033 | *   |
|                           | angle:mass           | (1, 513) | 3.057  | 0.081 |     |
|                           | curvature:mass       | (1, 513) | 8.737  | 0.003 | **  |
|                           | stiffness:mass       | (1, 512) | 1.293  | 0.256 |     |
|                           | angle:curvature:mass | (1, 513) | 13.009 | 0.000 | *** |
| Minimum SE-Posteroventral | angle                | (1, 512) | 0.298  | 0.585 |     |
|                           | curvature            | (1, 512) | 8.653  | 0.003 | **  |
|                           | stiffness            | (1, 512) | 3.643  | 0.057 |     |
|                           | mass                 | (1, 4)   | 2.662  | 0.175 |     |
|                           | angle:curvature      | (1, 512) | 5.405  | 0.020 | *   |
|                           | angle:mass           | (1, 512) | 0.303  | 0.582 |     |
|                           | curvature:mass       | (1, 512) | 5.035  | 0.025 | *   |
|                           | stiffness:mass       | (1, 512) | 4.572  | 0.033 | *   |
|                           | angle:curvature:mass | (1, 512) | 5.093  | 0.024 | *   |
| Maximum SE-Ventral        | angle                | (1, 315) | 9.609  | 0.002 | **  |
|                           | curvature            | (1, 315) | 12.713 | 0.000 | *** |
|                           | stiffness            | (1, 315) | 1.225  | 0.269 |     |
|                           | mass                 | (1, 166) | 8.346  | 0.004 | **  |
|                           | angle:curvature      | (1, 315) | 13.778 | 0.000 | *** |
|                           | angle:mass           | (1, 315) | 11.621 | 0.001 | *** |
|                           | curvature:mass       | (1, 315) | 13.201 | 0.000 | *** |
|                           | stiffness:mass       | (1, 312) | 0.732  | 0.393 |     |
|                           | angle:curvature:mass | (1, 315) | 14.204 | 0.000 | *** |
| Minimum SE-Ventral        | angle                | (1, 313) | 0.158  | 0.691 |     |
|                           | curvature            | (1, 310) | 0.041  | 0.840 |     |
|                           | stiffness            | (1, 249) | 1.008  | 0.316 |     |
|                           | mass                 | (1, 260) | 0.000  | 0.989 |     |

|                                                             |                      |          |       |       |  |
|-------------------------------------------------------------|----------------------|----------|-------|-------|--|
|                                                             | angle:curvature      | (1, 312) | 0.146 | 0.702 |  |
|                                                             | angle:mass           | (1, 312) | 0.177 | 0.674 |  |
|                                                             | curvature:mass       | (1, 310) | 0.067 | 0.796 |  |
|                                                             | stiffness:mass       | (1, 202) | 0.584 | 0.446 |  |
|                                                             | angle:curvature:mass | (1, 312) | 0.176 | 0.675 |  |
| * – <0.05 P-VALUE; ** – <0.01 P-VALUE; *** – <0.001 P-VALUE |                      |          |       |       |  |
